# Supplementary material
Source: MDPI journal article supplement (https://www.mdpi.com/1424-8247/15/11/1396)
Supplement: s1 [file s1]

A)

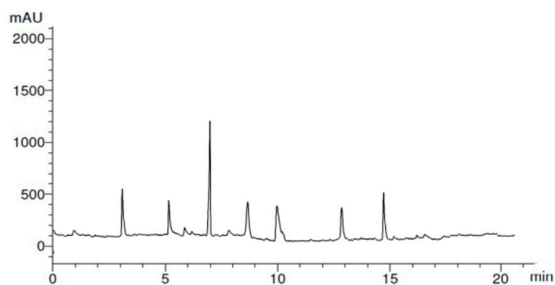

| RT#  | Compound    | Concentration<br>µg/ml |
|------|-------------|------------------------|
| 3.0  | Chlorogenic | 5.22                   |
| 5.0  | Syringenic  | 3.15                   |
| 7.0  | Cinnamic    | 11.65                  |
| 8.7  | Pyrogallol  | 3.64                   |
| 10.0 | Gallic      | 4.18                   |
| 13.0 | Ellagic     | 1.36                   |
| 15.0 | Benzoic     | 5.37                   |

RT: 0.00 - 39.32 SM: 15B

B)

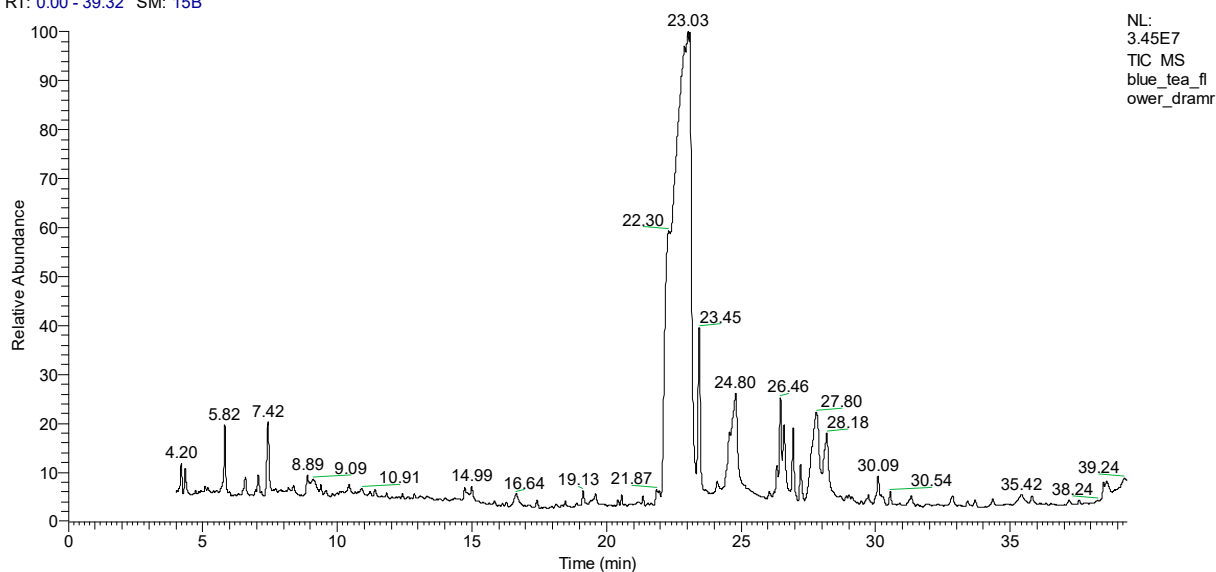

NL:  
3.45E7  
TIC MS  
blue\_tea\_fl  
ower\_dramr

| Compound number | Retention time | Compound name                                          | Area% | Molecular weight | Molecular formula |
|-----------------|----------------|--------------------------------------------------------|-------|------------------|-------------------|
| 1               | 4.21           | Acetaldehyde, diisobutyl acetal                        | 0.81  | 174              | C10H22O2          |
| 2               | 4.34           | 4.34 BUTANE, 1,1'[METHYLENEBIS(OXY)]BIS-               | 0.85  | 160              | C9H20O2           |
| 3               | 5.82           | 1,1-Diisobutoxy-isobutane                              | 1.75  | 202              | C12H26O2          |
| 4               | 6.58           | 2,5-Methylene-d,l-rhamnitol                            | 0.58  | 178              | C7H14O5           |
| 5               | 7.06           | 2-Propanone, 1,1-dibutoxy-                             | 0.65  | 202              | C11H22O3          |
| 6               | 7.43           | PROPANE, 1,1',1''-[METHYLIDYNETRIS(OXY)]TRIS[2-METHYL- | 2.30  | 232              | C13H28O3          |
| 7               | 8.89           | 3,3-DIMETHYL-4-OXO-HEXANOIC ACID                       | 0.46  | 158              | C8H14O3           |
| 8               | 19.13          | Methyl tetradecanoate                                  | 0.42  | 242              | C15H30O2          |
| 9               | 23.04          | 1,2-Benzenedicarboxylic acid,bis(2-methylpropyl) ester | 51.02 | 278              | C16H22O4          |
| 10              | 23.11          | DIISOBUTYL BENZENE-1,2-DICARBOXYLATE                   | 11.16 | 278              | C16H22O4          |
| 11              | 23.45          | Hexadecanoic acid, methyl ester                        | 5.14  | 270              | C17H34O2          |
| 12              | 24.80          | n-Hexadecanoic acid                                    | 5.60  | 256              | C16H32O2          |
| 13              | 26.33          | 7-Methyl-Z-tetradecen-1-ol acetate                     | 0.49  | 268              | C17H32O2          |
| 14              | 26.47          | 9-Octadecenoic acid (Z)-, methyl ester                 | 4.85  | 296              | C19H36O2          |

|    |       |                                                    |      |     |          |
|----|-------|----------------------------------------------------|------|-----|----------|
| 15 | 26.94 | Methyl stearate                                    | 2.10 | 298 | C19H38O2 |
| 16 | 27.21 | Hexadecanoic acid, 2-methylpropylester             | 1.15 | 312 | C20H40O2 |
| 17 | 27.79 | cis-Vaccenic acid                                  | 5.25 | 282 | C18H34O2 |
| 18 | 28.19 | Octadecanoic acid                                  | 2.42 | 284 | C18H36O2 |
| 19 | 30.09 | Oleic Acid                                         | 0.97 | 282 | C18H34O2 |
| 20 | 30.54 | Octadecanoic acid, 2-hydroxy-1,3-propanediyl ester | 0.39 | 624 | C39H76O5 |
| 21 | 38.46 | tert-Hexadecanethiol                               | 0.44 | 258 | C16H34S  |

Supplementary Figure S1. The chemical composition of *Asian pigeonwing*. A) HPLC Chromatograph Report. B) GC-TSQ mass spectrometer
